# Supplementary material
Source: Research Square preprint supplement (doi:10.21203/rs.3.rs-9401695/v1)

# Average Value

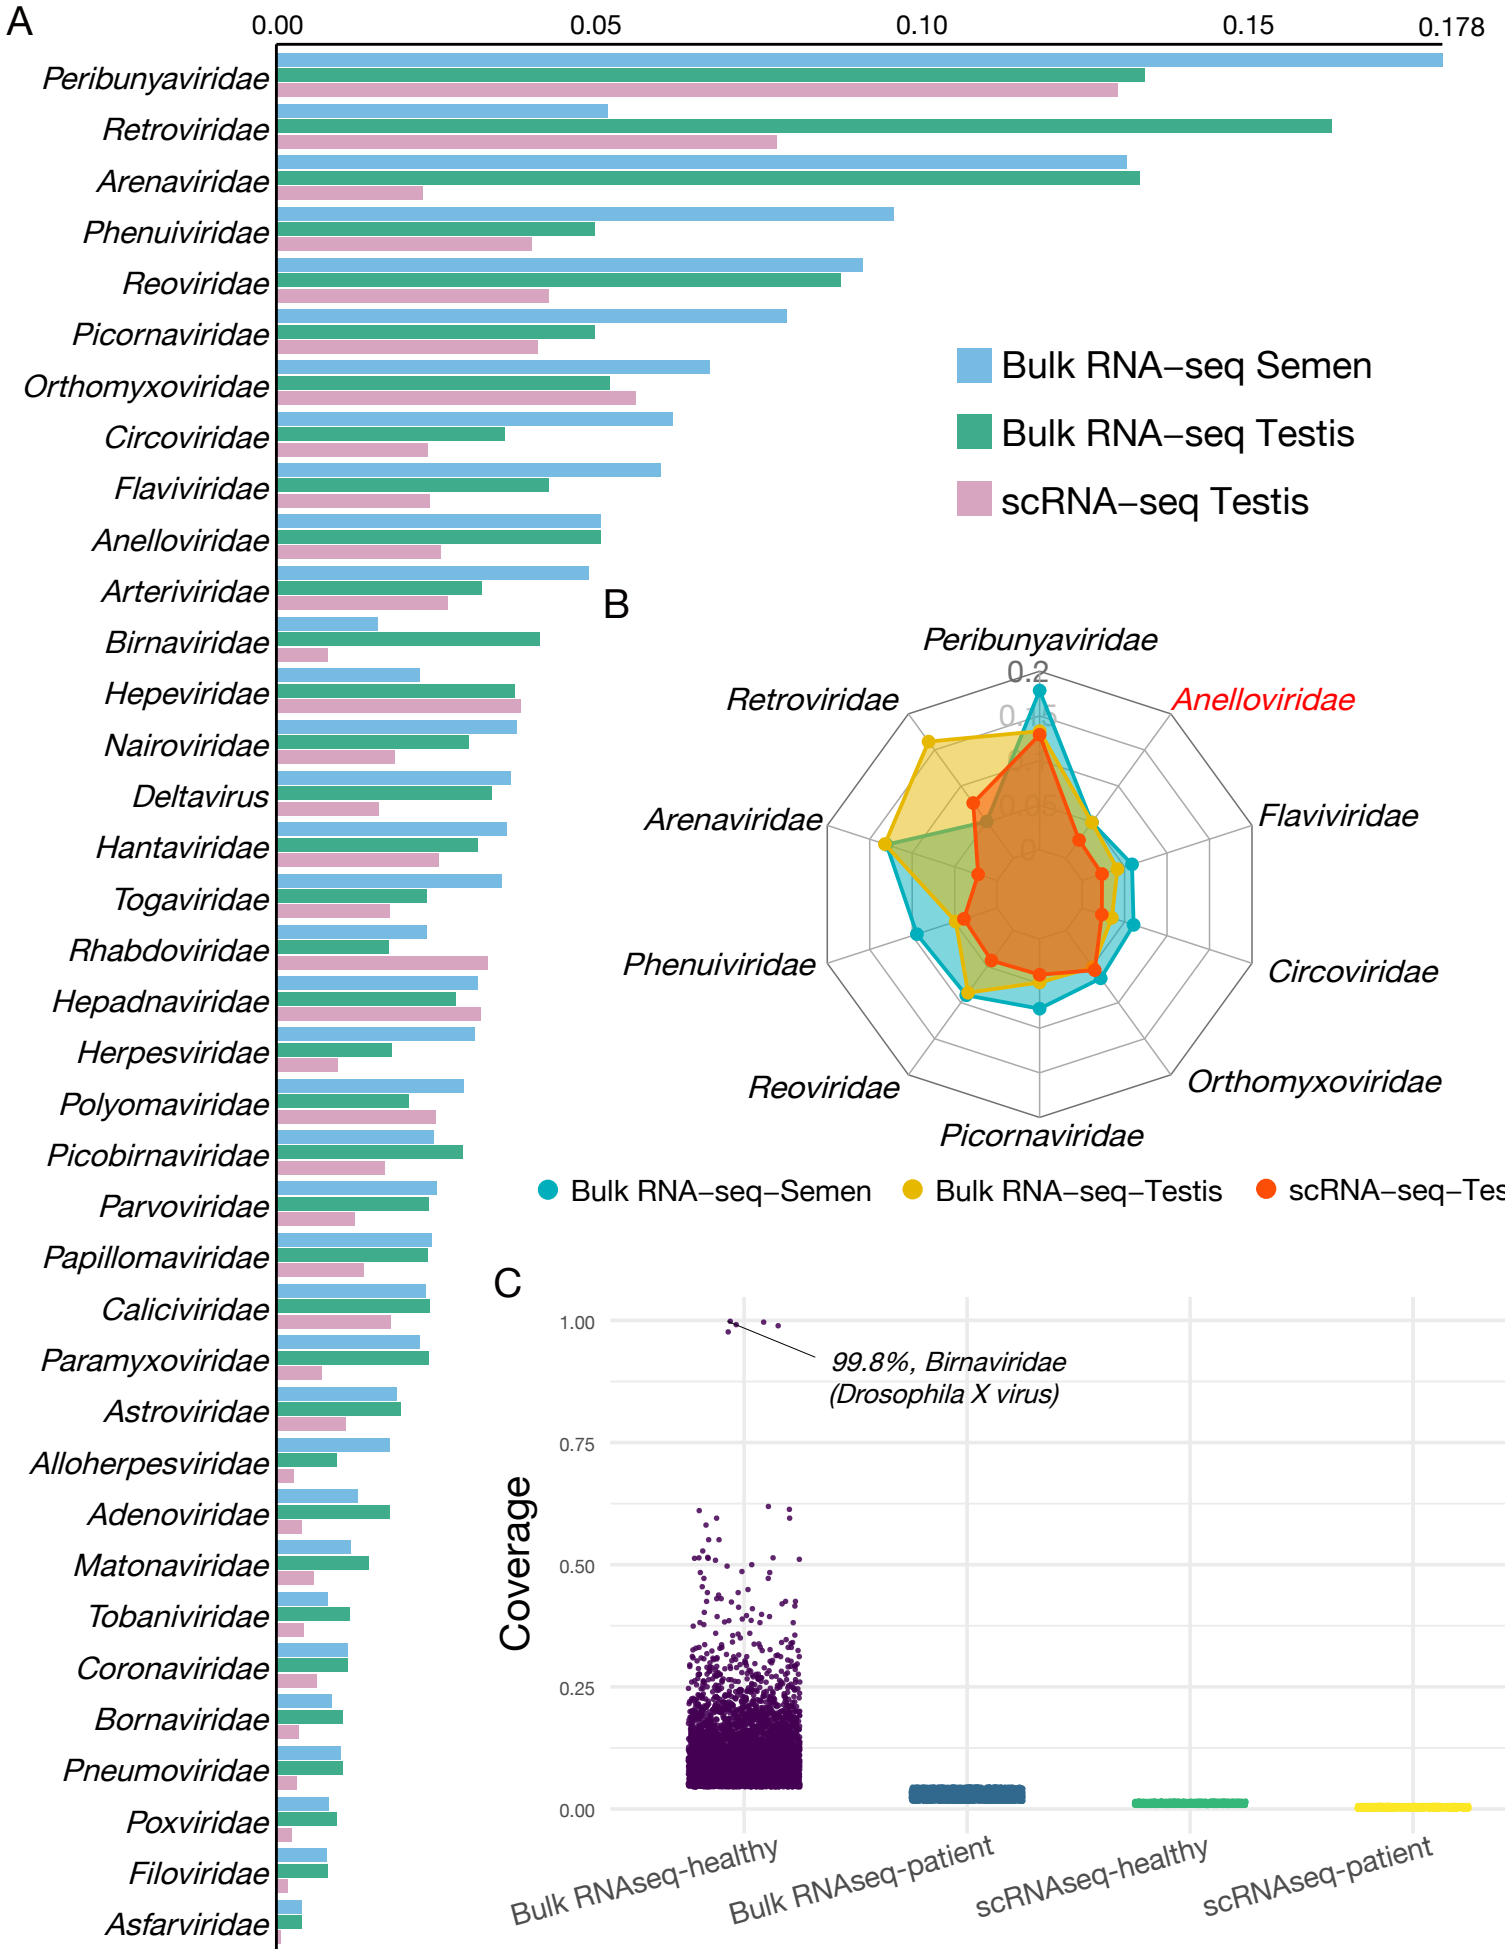

Supplemental Figure 1

# Bulk RNA seq

A

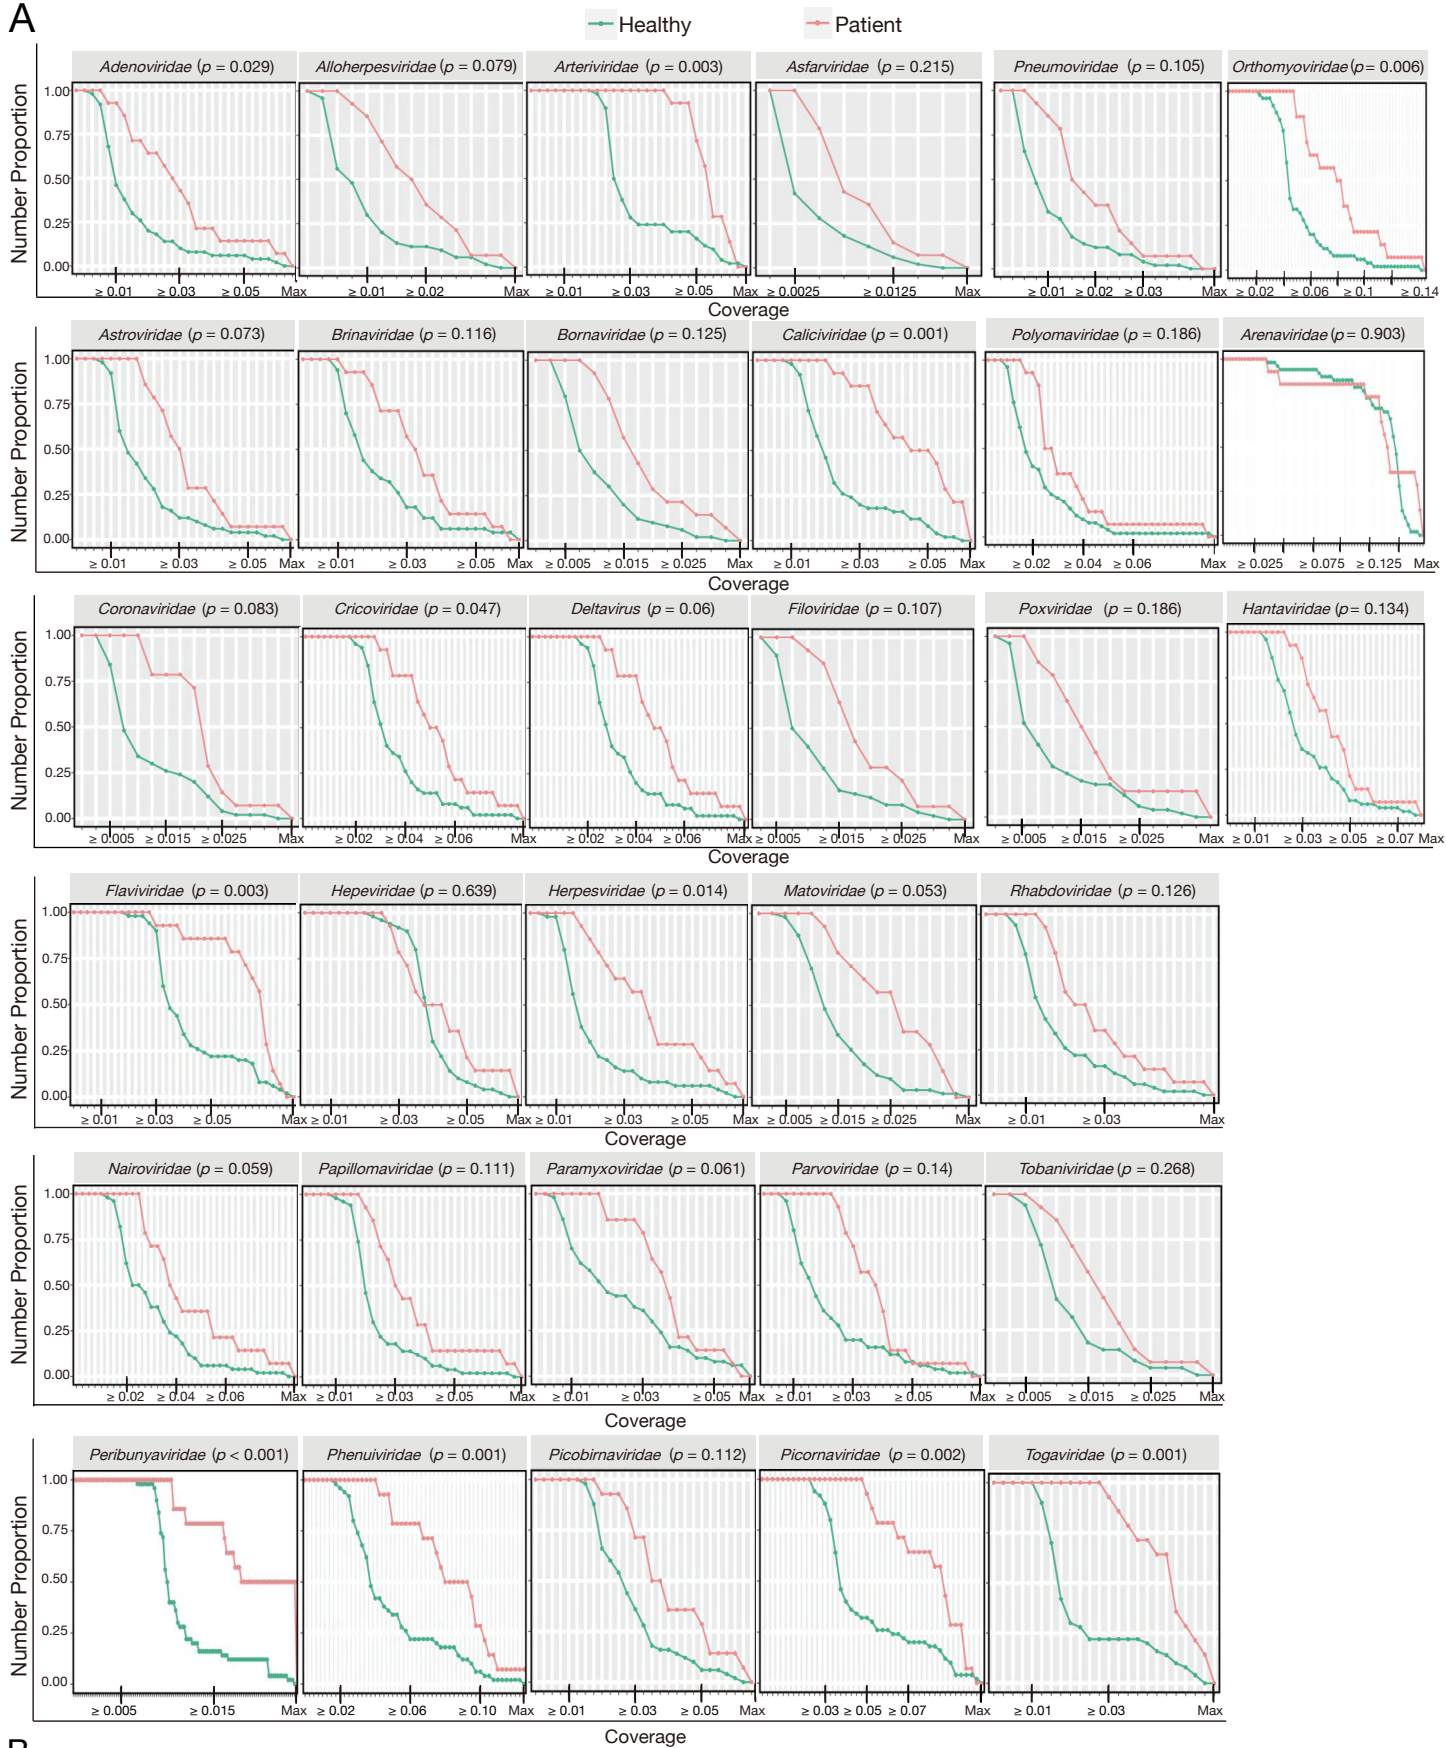

B

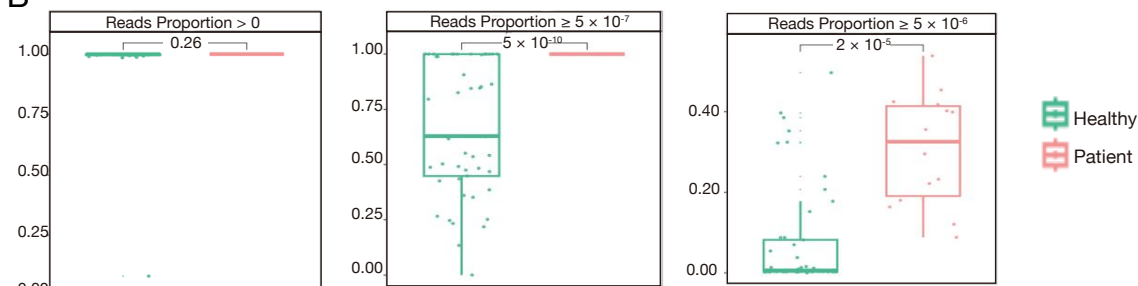

Supplemental Figure 2

# scRNA seq

Healthy Patient

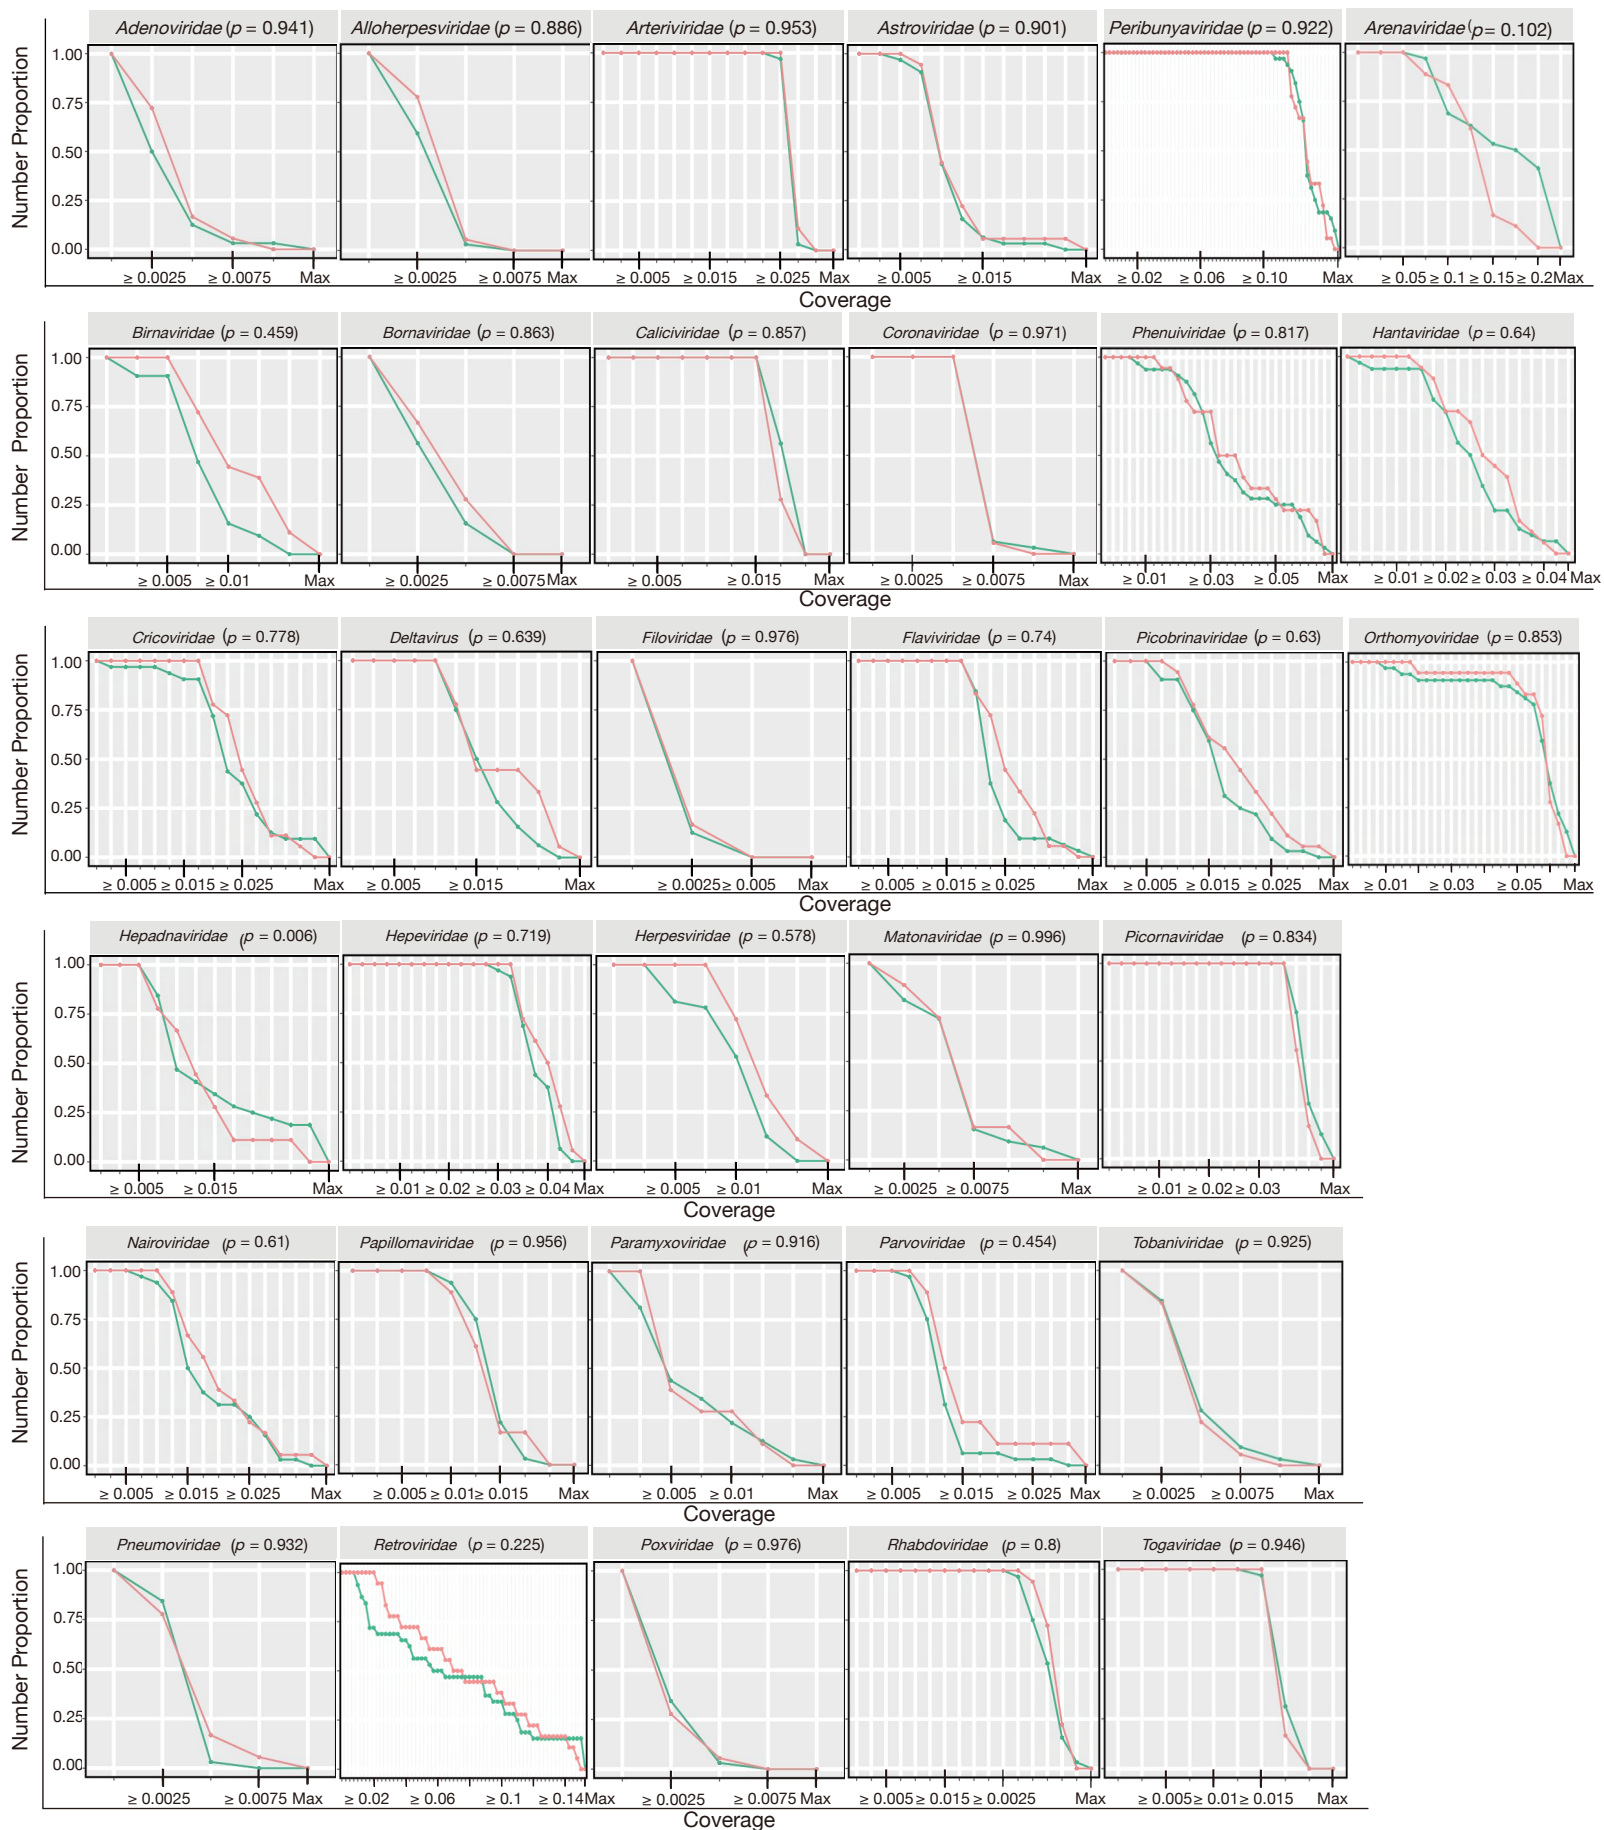

Supplemental Figure 3

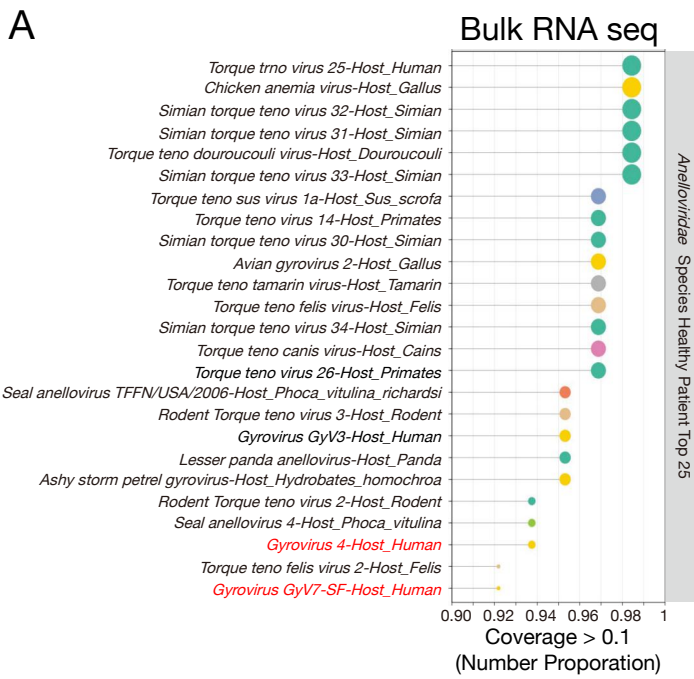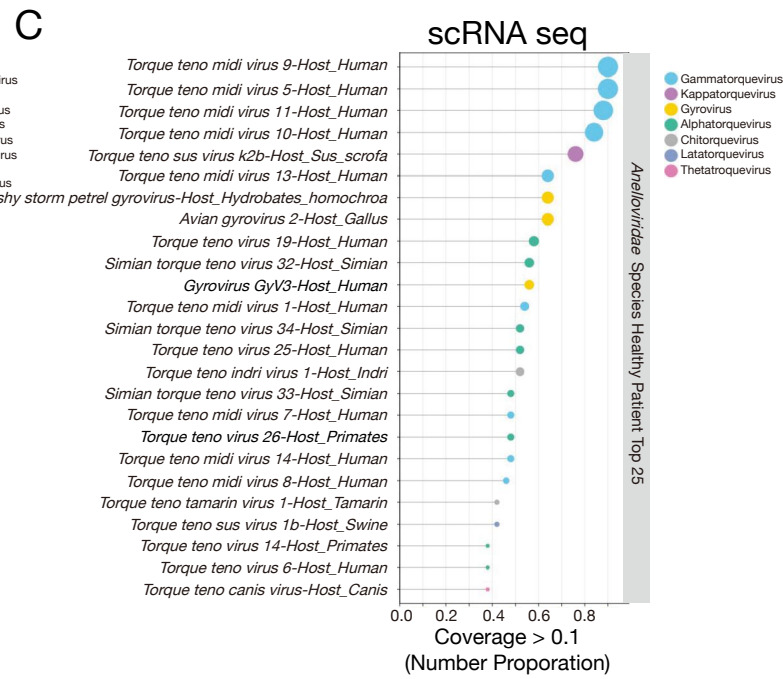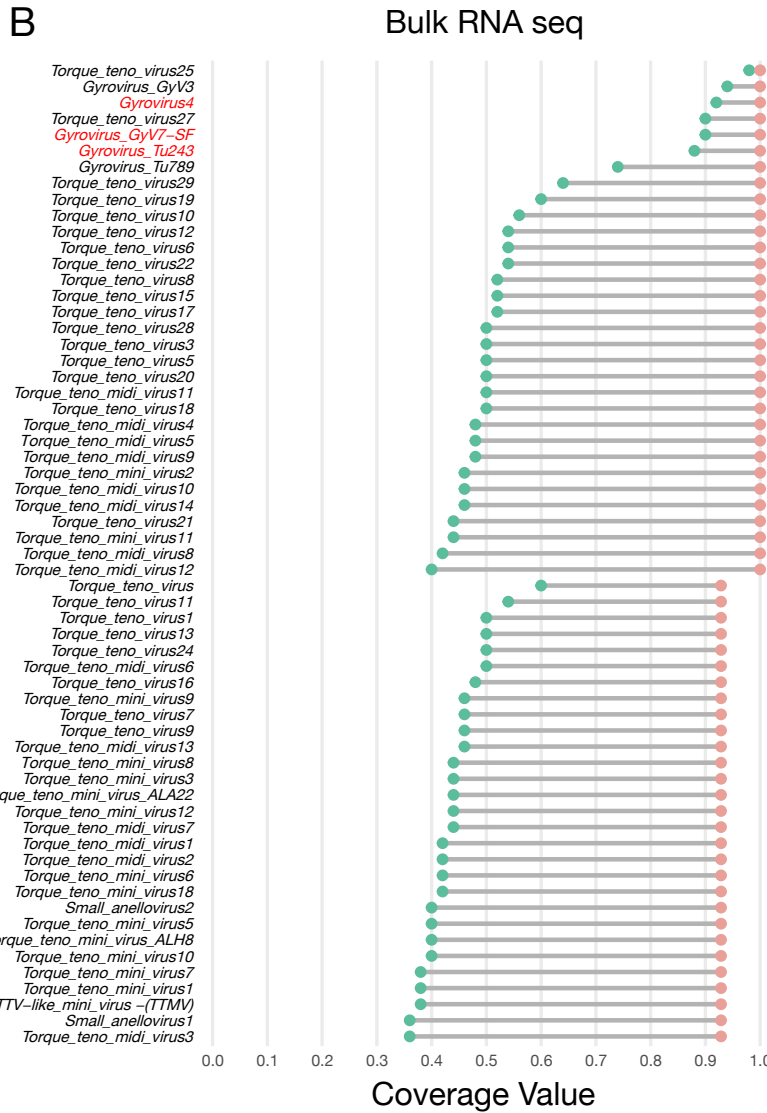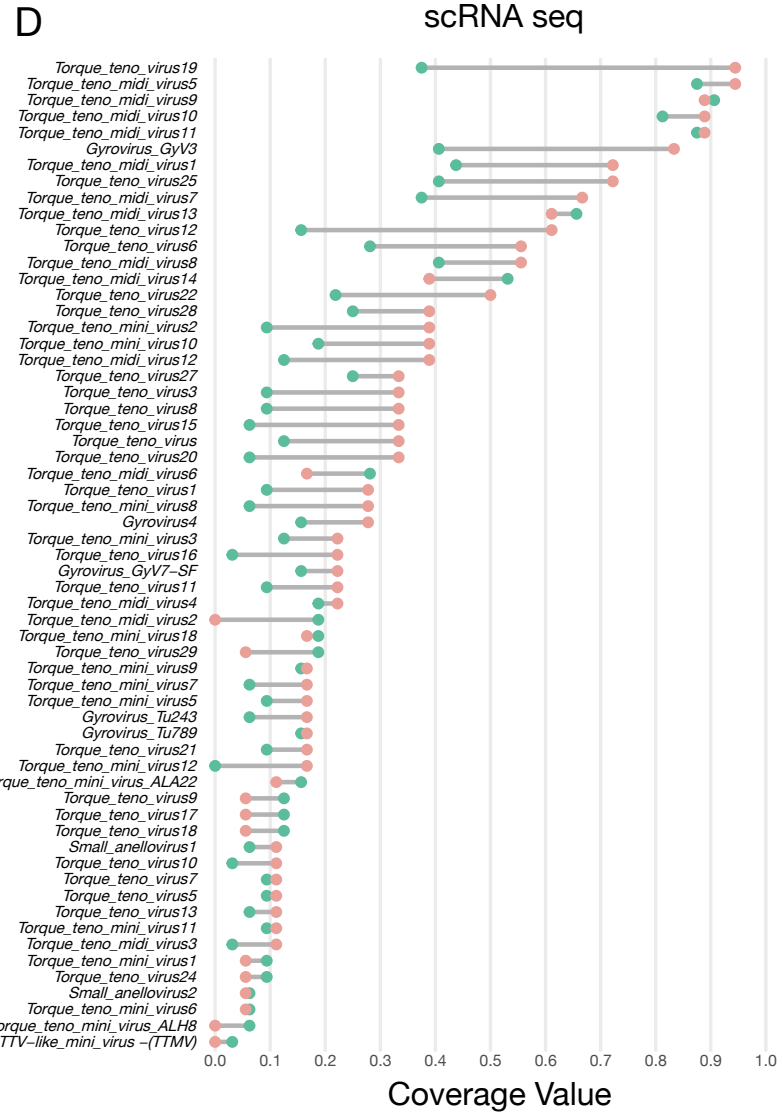

Supplemental Figure 4

A

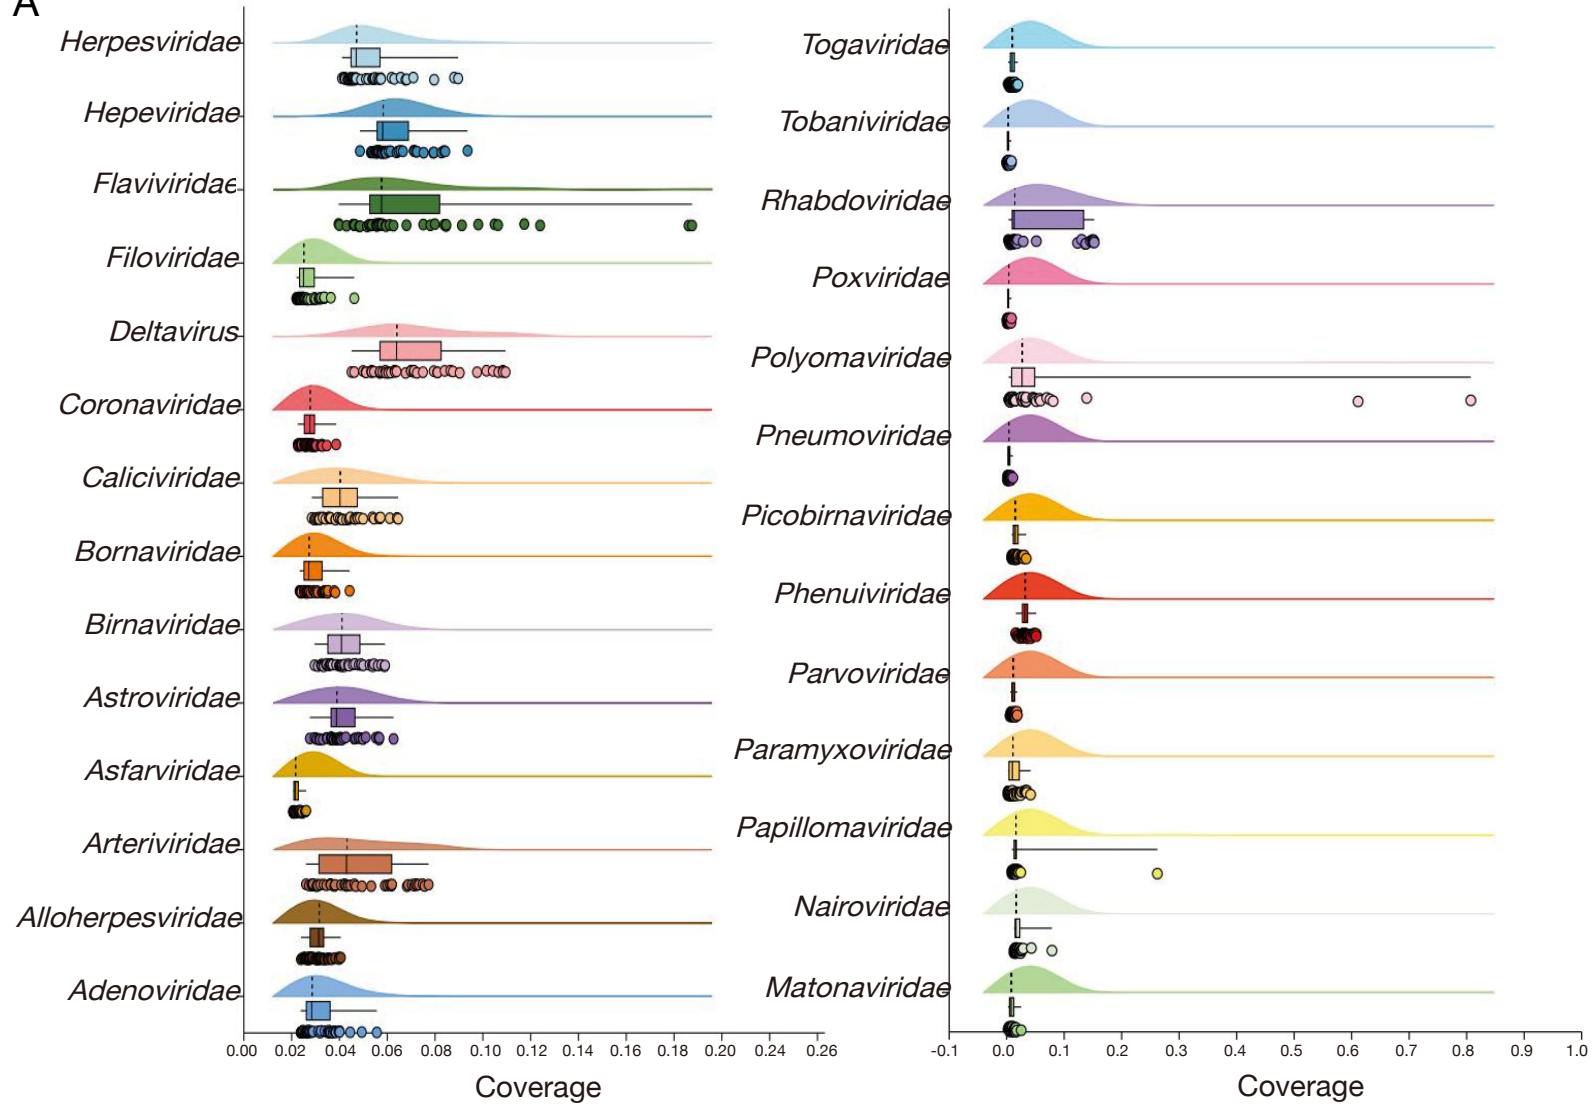

B

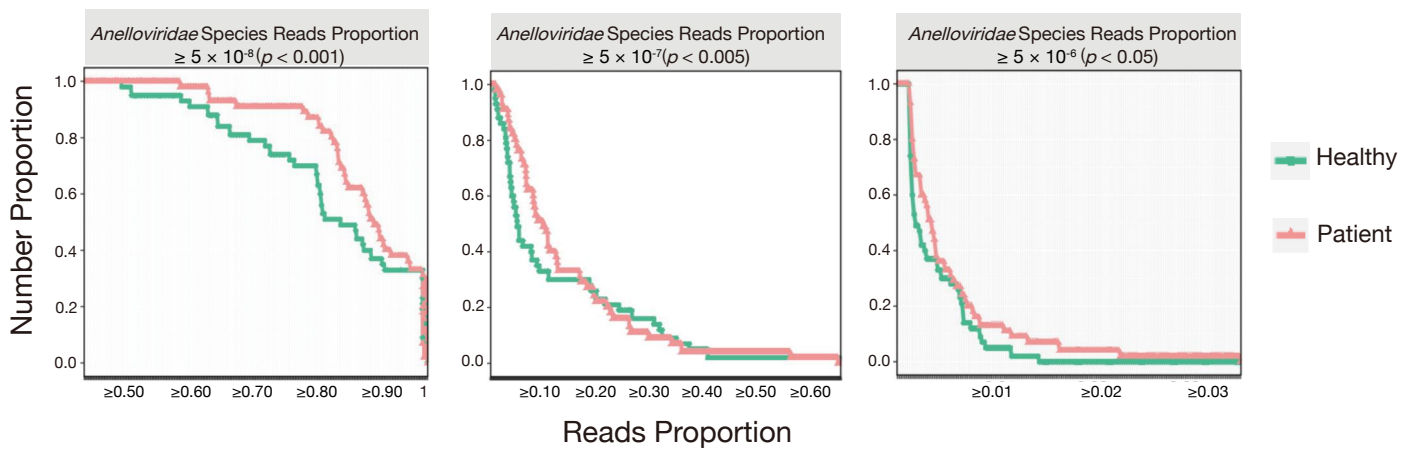

Supplemental Figure 5

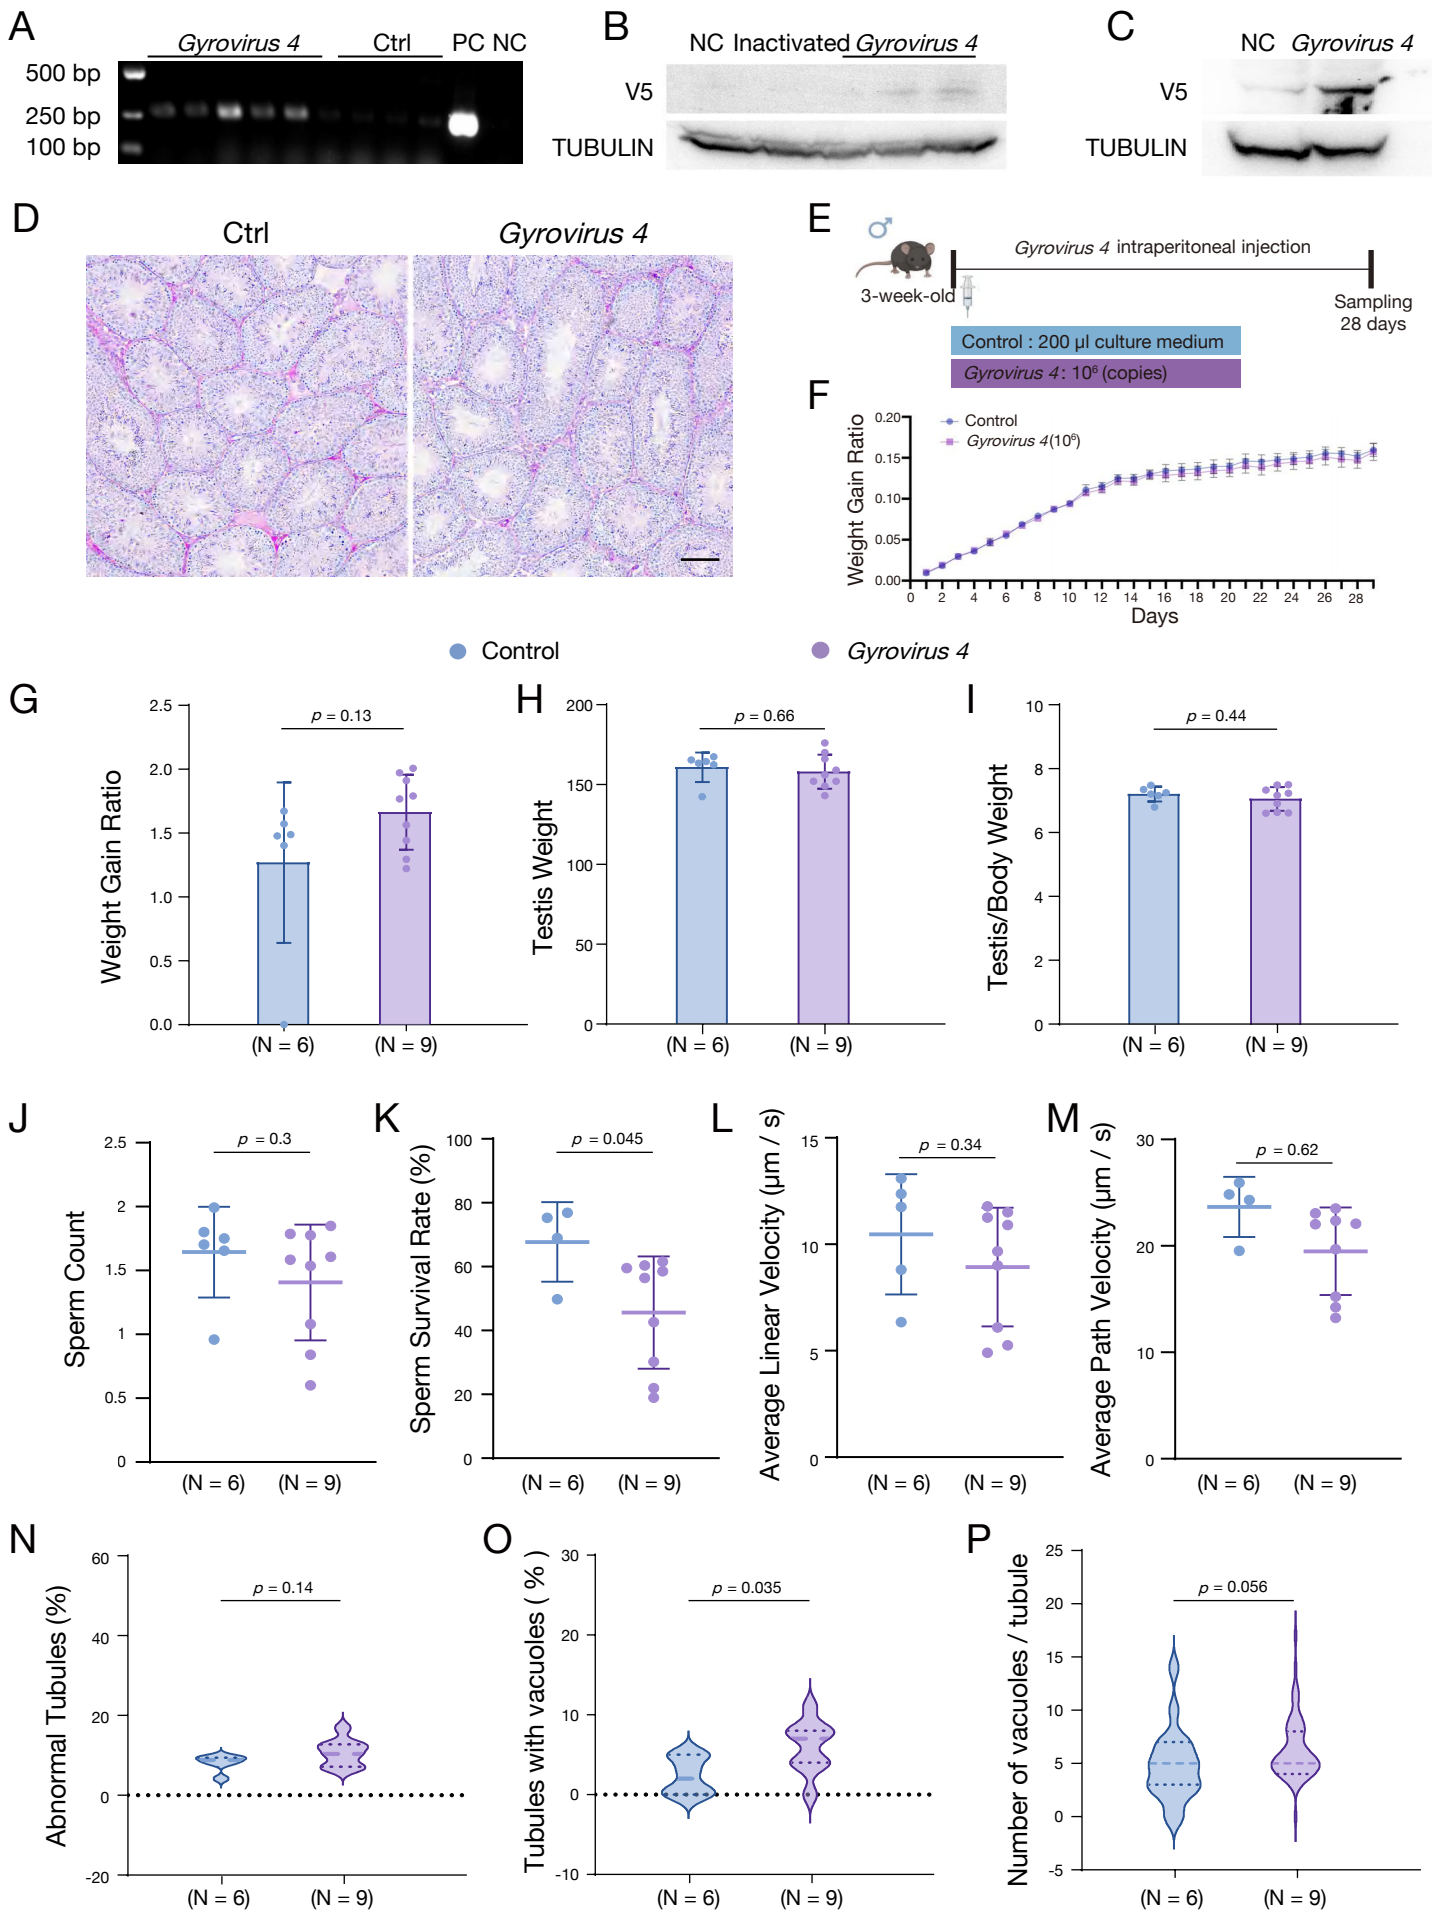

Supplemental Figure 6

**A**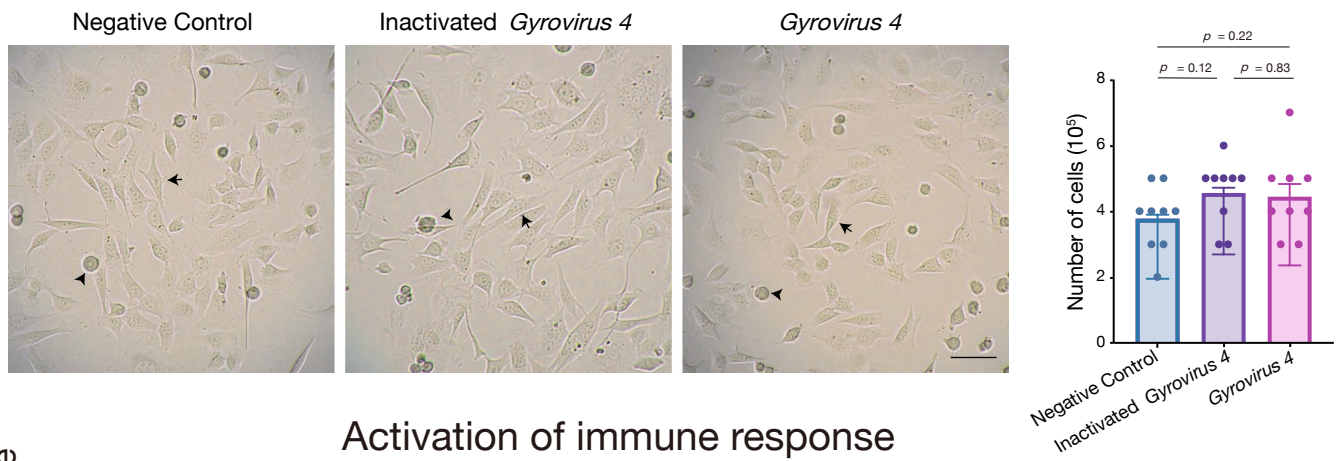**B**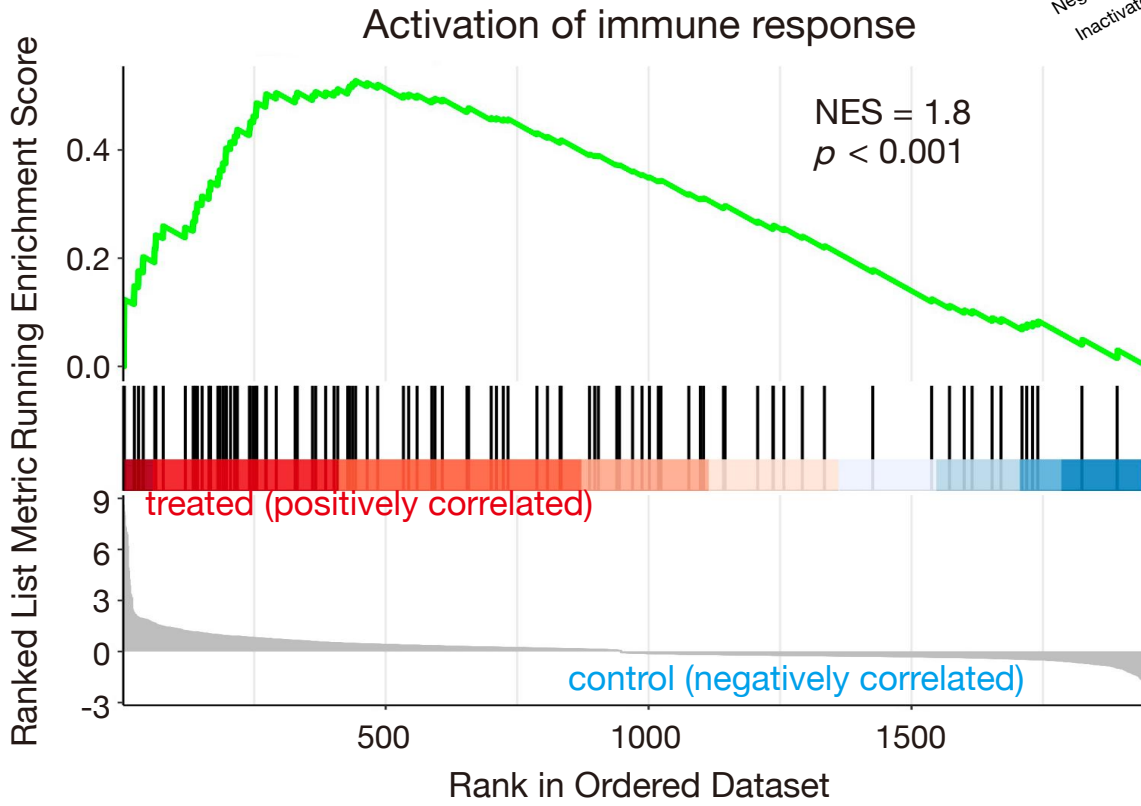**C**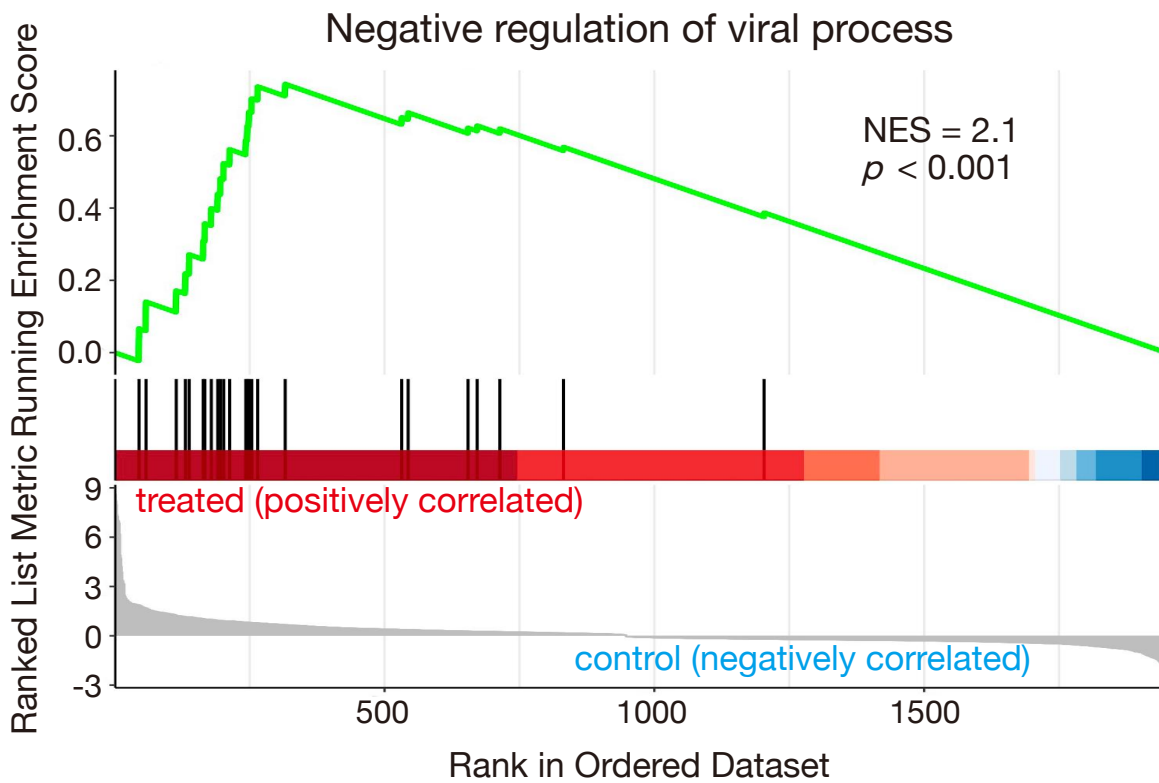

Supplement: Supplementary file 1 [file 3405e9ac950cdb5882e4505b.pdf]
